# Supplementary material
Source: PubMed Central journal article supplement (PMC4340484)
Supplement: NIHMS662706-supplement-Supplemental_Table_1.pdf [file NIHMS662706-supplement-Supplemental_Table_1.pdf]

**Supplementary Table 1.** Primer sequences for gene expression analyses.

| Gene                    | Forward                         | Reverse                         | Reference |
|-------------------------|---------------------------------|---------------------------------|-----------|
| <i>Csf1</i><br>(M-CSF)  | 5'-GACTTCATGCCAGATTGCC-3'       | 5'-GGTGGCTTTAGGGTACAGG-3'       | 1         |
| <i>Csf2</i><br>(GM-CSF) | 5'-ATGCCTGTACGTTGAATGAAG-3'     | 5'-GCGGGTCTGCACACATGTTA-3'      | 2         |
| <i>Csf3</i><br>(G-CSF)  | 5'-CTCAACTTTCTGCCAGAGG-3'       | 5'-AGCTGGCTTAGGCACTGTGT-3'      | 3         |
| <i>Ccl2</i>             | 5'-CCCAATGAGTAGGCTGGAGA-3'      | 5'-AAAATGGATCCACACCTTGC-3'      | 4         |
| <i>Timp1</i>            | 5'-GTGGGAAATGCCGAGATATC-3'      | 5'-GACCTGATCCGTCACAAAC-3'       |           |
| <i>Cxcl1</i>            | 5'- TGGCTGGGATTCACCTCAAGAACA-3' | 5'- TGTGGCTATGACTTCGGTTTGGGT-3' | 5         |
| <i>Cxcl2</i>            | 5'-CTCTCAAGGGCGGTCAAAAAGTT-3'   | 5'-TCAGACAGCGAGGCACATCAGGTA-3'  | 6         |
| <i>CycA</i>             | 5'-GAGCTGTTGCAGACAAAGTTC-3'     | 5'-CCCTGGCACATGAATCCTGG-3'      | 7         |

**REFERENCES**

1. Kitaura H, Zhou P, Kim HJ, et al. M-CSF mediates TNF-induced inflammatory osteolysis. *J Clin Invest* 2005;115:3418-27.
2. Baxter EW, Mirabella F, Bowers SR, et al. The inducible tissue-specific expression of the human IL-3/GM-CSF locus is controlled by a complex array of developmentally regulated enhancers. *J Immunol* 2012;189:4459-69.
3. Kimura A, Naka T, Muta T, et al. Suppressor of cytokine signaling-1 selectively inhibits LPS-induced IL-6 production by regulating JAK-STAT. *Proc Natl Acad Sci U S A* 2005;102:17089-94.
4. Qian BZ, Li J, Zhang H, et al. CCL2 recruits inflammatory monocytes to facilitate breast-tumour metastasis. *Nature* 2011;475:222-5.
5. Lee YH, Kim SH, Kim Y, et al. Inhibitory effect of the antidepressant imipramine on NF-kappaB-dependent CXCL1 expression in TNFalpha-exposed astrocytes. *Int Immunopharmacol* 2012;12:547-55.
6. Mirpuri J, Sotnikov I, Myers L, et al. *Lactobacillus rhamnosus* (LGG) regulates IL-10 signaling in the developing murine colon through upregulation of the IL-10R2 receptor subunit. *PLoS One* 2012;7:e51955.
7. Fong L, Muhlhausler BS, Gibson RA, et al. Perinatal maternal dietary supplementation of omega3-fatty acids transiently affects bone marrow microenvironment, osteoblast and osteoclast formation, and bone mass in male offspring. *Endocrinology* 2012;153:2455-65.
